# Supplementary material for: Critical intervention points for European adaptation to cascading climate change impacts
Source: Research Square preprint supplement (doi:10.21203/rs.3.rs-6165925/v1), 2025-03-20
Supplement: Supplementary file 1 [file 0c4e6f2db46ed3b819a33fa2.xlsx]

## Sheet: EdgeWeights vs PageRankValues
## Comparison of country based input data and PageRank values ( format in cells: “mean outgoing edge weights / PageRank value”). ## In yellow we denote those pairs where input weights at the network edges suggest low risk, however where the recursive feedback centrality measure PageRank detects the risk (detailed description above). ## The top row provides abbreviations for the respective node na…
Country	BAN	DAL	DE	DIE	EG	EQL	FI	FPS	GT	IMD	ISR	LL	RU	RWA	VCU
ISO_3
AGO	0.00 / 0.04	0.07 / 0.10	0.00 / 0.06	0.06 / 0.09	0.00 / 0.05	0.00 / 0.05	0.03 / 0.05	0.01 / 0.04	0.00 / 0.04	0.06 / 0.06	0.07 / 0.07	0.14 / 0.10	0.05 / 0.05	0.00 / 0.10	0.00 / 0.04
ALB	0.00 / 0.04	0.04 / 0.11	0.00 / 0.06	0.03 / 0.08	0.00 / 0.04	0.02 / 0.06	0.01 / 0.05	0.01 / 0.05	0.00 / 0.04	0.02 / 0.07	0.07 / 0.07	0.03 / 0.10	0.01 / 0.04	0.01 / 0.10	0.00 / 0.04
ARE	0.00 / 0.04	0.00 / 0.07	0.00 / 0.07	0.04 / 0.09	0.01 / 0.06	0.00 / 0.06	0.01 / 0.07	0.04 / 0.07	0.00 / 0.04	0.04 / 0.08	0.03 / 0.07	0.01 / 0.05	0.01 / 0.05	0.06 / 0.07	0.00 / 0.04
ARG	0.00 / 0.04	0.04 / 0.08	0.07 / 0.08	0.02 / 0.07	0.03 / 0.06	0.00 / 0.06	0.01 / 0.05	0.00 / 0.04	0.00 / 0.04	0.07 / 0.07	0.06 / 0.06	0.04 / 0.10	0.01 / 0.04	0.05 / 0.09	0.00 / 0.04
ARM	0.00 / 0.04	0.04 / 0.10	0.00 / 0.06	0.01 / 0.05	0.00 / 0.04	0.01 / 0.05	0.01 / 0.06	0.01 / 0.05	0.00 / 0.04	0.07 / 0.06	0.08 / 0.09	0.03 / 0.06	0.00 / 0.04	0.03 / 0.10	0.18 / 0.09
AUS	0.00 / 0.04	0.01 / 0.08	0.02 / 0.08	0.04 / 0.09	0.02 / 0.06	0.00 / 0.06	0.00 / 0.07	0.00 / 0.04	0.00 / 0.04	0.07 / 0.08	0.03 / 0.07	0.01 / 0.05	0.00 / 0.04	0.00 / 0.08	0.00 / 0.04
AZE	0.00 / 0.04	0.04 / 0.10	0.00 / 0.06	0.02 / 0.05	0.00 / 0.04	0.01 / 0.05	0.01 / 0.05	0.01 / 0.04	0.00 / 0.04	0.11 / 0.07	0.07 / 0.08	0.05 / 0.07	0.01 / 0.05	0.10 / 0.10	0.18 / 0.09
BDI	0.00 / 0.04	0.10 / 0.11	0.00 / 0.06	0.06 / 0.08	0.05 / 0.06	0.00 / 0.05	0.04 / 0.05	0.01 / 0.04	0.00 / 0.04	0.08 / 0.06	0.07 / 0.06	0.19 / 0.10	0.06 / 0.05	0.01 / 0.10	0.00 / 0.04
BEN	0.00 / 0.04	0.03 / 0.09	0.00 / 0.06	0.07 / 0.10	0.06 / 0.06	0.00 / 0.05	0.01 / 0.04	0.01 / 0.04	0.00 / 0.04	0.03 / 0.06	0.07 / 0.06	0.18 / 0.11	0.05 / 0.04	0.04 / 0.09	0.00 / 0.04
BFA	0.00 / 0.04	0.09 / 0.10	0.00 / 0.06	0.07 / 0.08	0.10 / 0.06	0.00 / 0.05	0.02 / 0.04	0.01 / 0.04	0.00 / 0.04	0.12 / 0.07	0.06 / 0.05	0.22 / 0.09	0.06 / 0.05	0.01 / 0.10	0.16 / 0.07
BGD	0.00 / 0.04	0.04 / 0.10	0.00 / 0.06	0.06 / 0.09	0.05 / 0.06	0.00 / 0.05	0.02 / 0.05	0.01 / 0.04	0.00 / 0.04	0.09 / 0.07	0.06 / 0.06	0.13 / 0.10	0.04 / 0.04	0.07 / 0.10	0.00 / 0.04
BHR	0.00 / 0.04	0.00 / 0.10	0.00 / 0.07	0.03 / 0.06	0.01 / 0.06	0.00 / 0.05	0.01 / 0.06	0.04 / 0.06	0.00 / 0.04	0.01 / 0.06	0.05 / 0.07	0.01 / 0.08	0.00 / 0.04	0.12 / 0.10	0.00 / 0.04
BLR	0.00 / 0.04	0.01 / 0.11	0.00 / 0.06	0.00 / 0.05	0.00 / 0.04	0.02 / 0.06	0.01 / 0.05	0.01 / 0.05	0.00 / 0.04	0.04 / 0.07	0.05 / 0.07	0.03 / 0.10	0.00 / 0.04	0.03 / 0.10	0.00 / 0.04
BOL	0.00 / 0.04	0.03 / 0.09	0.00 / 0.06	0.05 / 0.09	0.00 / 0.04	0.00 / 0.06	0.02 / 0.05	0.03 / 0.05	0.00 / 0.04	0.04 / 0.06	0.07 / 0.07	0.11 / 0.10	0.02 / 0.04	0.03 / 0.10	0.00 / 0.04
BRA	0.00 / 0.04	0.03 / 0.08	0.05 / 0.07	0.05 / 0.09	0.01 / 0.04	0.00 / 0.05	0.01 / 0.05	0.00 / 0.04	0.00 / 0.04	0.08 / 0.06	0.06 / 0.08	0.07 / 0.08	0.01 / 0.04	0.02 / 0.09	0.12 / 0.08
BWA	0.00 / 0.04	0.03 / 0.10	0.00 / 0.06	0.04 / 0.09	0.00 / 0.04	0.00 / 0.06	0.03 / 0.05	0.01 / 0.05	0.00 / 0.04	0.01 / 0.06	0.06 / 0.06	0.10 / 0.10	0.03 / 0.05	0.05 / 0.10	0.00 / 0.04
CAF	0.00 / 0.04	0.08 / 0.10	0.00 / 0.06	0.07 / 0.08	0.04 / 0.05	0.00 / 0.05	0.06 / 0.05	0.01 / 0.04	0.00 / 0.04	0.11 / 0.07	0.09 / 0.07	0.19 / 0.08	0.04 / 0.05	0.00 / 0.08	0.18 / 0.07
CAN	0.00 / 0.04	0.02 / 0.08	0.05 / 0.09	0.04 / 0.09	0.04 / 0.06	0.03 / 0.06	0.00 / 0.07	0.00 / 0.04	0.00 / 0.04	0.07 / 0.08	0.03 / 0.06	0.02 / 0.06	0.01 / 0.04	0.00 / 0.09	0.00 / 0.04
CHE	0.00 / 0.04	0.00 / 0.10	0.00 / 0.07	0.02 / 0.06	0.03 / 0.06	0.02 / 0.06	0.01 / 0.06	0.01 / 0.06	0.00 / 0.04	0.08 / 0.08	0.01 / 0.05	0.01 / 0.06	0.01 / 0.04	0.02 / 0.10	0.00 / 0.04
CHL	0.00 / 0.04	0.01 / 0.08	0.00 / 0.06	0.04 / 0.10	0.08 / 0.06	0.00 / 0.05	0.01 / 0.05	0.03 / 0.06	0.00 / 0.04	0.10 / 0.07	0.04 / 0.05	0.05 / 0.10	0.01 / 0.04	0.00 / 0.09	0.00 / 0.04
CHN	0.00 / 0.04	0.03 / 0.10	0.01 / 0.06	0.04 / 0.09	0.00 / 0.04	0.01 / 0.06	0.01 / 0.04	0.00 / 0.04	0.00 / 0.04	0.00 / 0.06	0.04 / 0.06	0.06 / 0.10	0.02 / 0.05	0.01 / 0.10	0.00 / 0.04
CMR	0.00 / 0.04	0.05 / 0.09	0.00 / 0.06	0.06 / 0.09	0.09 / 0.06	0.00 / 0.05	0.01 / 0.04	0.01 / 0.04	0.00 / 0.04	0.11 / 0.07	0.06 / 0.05	0.18 / 0.09	0.04 / 0.05	0.00 / 0.10	0.16 / 0.07
COD	0.00 / 0.04	0.07 / 0.09	0.00 / 0.06	0.07 / 0.08	0.08 / 0.05	0.00 / 0.05	0.05 / 0.05	0.01 / 0.04	0.00 / 0.04	0.11 / 0.06	0.09 / 0.06	0.20 / 0.08	0.05 / 0.05	0.02 / 0.10	0.16 / 0.07
COG	0.00 / 0.04	0.04 / 0.10	0.00 / 0.06	0.06 / 0.09	0.00 / 0.04	0.00 / 0.06	0.05 / 0.05	0.01 / 0.04	0.00 / 0.04	0.09 / 0.07	0.09 / 0.07	0.13 / 0.09	0.04 / 0.05	0.04 / 0.10	0.00 / 0.04
COL	0.00 / 0.04	0.02 / 0.08	0.00 / 0.06	0.04 / 0.09	0.08 / 0.06	0.00 / 0.05	0.01 / 0.05	0.03 / 0.05	0.00 / 0.04	0.12 / 0.06	0.05 / 0.06	0.11 / 0.08	0.02 / 0.04	0.01 / 0.09	0.12 / 0.07
CRI	0.00 / 0.04	0.02 / 0.09	0.00 / 0.06	0.03 / 0.09	0.00 / 0.04	0.03 / 0.06	0.01 / 0.05	0.03 / 0.06	0.00 / 0.04	0.10 / 0.07	0.04 / 0.07	0.03 / 0.09	0.02 / 0.05	0.00 / 0.08	0.00 / 0.04
DJI	0.00 / 0.04	0.00 / 0.07	0.00 / 0.06	0.05 / 0.11	0.04 / 0.06	0.00 / 0.06	0.02 / 0.05	0.01 / 0.06	0.00 / 0.04	0.08 / 0.06	0.07 / 0.06	0.16 / 0.11	0.02 / 0.04	0.00 / 0.07	0.00 / 0.04
DOM	0.00 / 0.04	0.01 / 0.08	0.00 / 0.07	0.04 / 0.10	0.00 / 0.04	0.00 / 0.06	0.01 / 0.05	0.03 / 0.06	0.00 / 0.04	0.07 / 0.07	0.06 / 0.07	0.06 / 0.10	0.02 / 0.05	0.02 / 0.08	0.00 / 0.04
DZA	0.00 / 0.04	0.01 / 0.08	0.00 / 0.06	0.05 / 0.10	0.05 / 0.06	0.02 / 0.05	0.00 / 0.04	0.04 / 0.05	0.00 / 0.04	0.06 / 0.07	0.06 / 0.06	0.08 / 0.11	0.03 / 0.04	0.05 / 0.09	0.00 / 0.04
ECU	0.00 / 0.04	0.04 / 0.10	0.00 / 0.06	0.04 / 0.08	0.03 / 0.06	0.00 / 0.05	0.03 / 0.05	0.03 / 0.05	0.00 / 0.04	0.10 / 0.07	0.05 / 0.06	0.08 / 0.10	0.02 / 0.04	0.00 / 0.08	0.00 / 0.04
EGY	0.00 / 0.04	0.02 / 0.08	0.00 / 0.06	0.04 / 0.09	0.08 / 0.06	0.02 / 0.05	0.00 / 0.04	0.04 / 0.05	0.00 / 0.04	0.08 / 0.06	0.06 / 0.06	0.11 / 0.09	0.02 / 0.04	0.12 / 0.09	0.12 / 0.07
ETH	0.00 / 0.04	0.07 / 0.10	0.00 / 0.06	0.08 / 0.09	0.04 / 0.05	0.00 / 0.05	0.04 / 0.05	0.01 / 0.04	0.00 / 0.04	0.10 / 0.07	0.05 / 0.06	0.18 / 0.08	0.06 / 0.06	0.00 / 0.08	0.16 / 0.07
GAB	0.00 / 0.04	0.03 / 0.10	0.00 / 0.06	0.05 / 0.09	0.00 / 0.04	0.00 / 0.06	0.02 / 0.05	0.01 / 0.04	0.00 / 0.04	0.01 / 0.06	0.08 / 0.07	0.10 / 0.10	0.03 / 0.05	0.00 / 0.10	0.00 / 0.04
GBR	0.00 / 0.04	0.00 / 0.10	0.00 / 0.07	0.02 / 0.06	0.05 / 0.06	0.02 / 0.06	0.01 / 0.06	0.01 / 0.06	0.00 / 0.04	0.08 / 0.07	0.03 / 0.06	0.02 / 0.06	0.01 / 0.04	0.00 / 0.10	0.00 / 0.04
GHA	0.00 / 0.04	0.05 / 0.10	0.00 / 0.06	0.06 / 0.09	0.00 / 0.04	0.00 / 0.06	0.00 / 0.04	0.01 / 0.04	0.00 / 0.04	0.03 / 0.07	0.05 / 0.06	0.12 / 0.11	0.04 / 0.05	0.03 / 0.10	0.00 / 0.04
GIN	0.00 / 0.04	0.07 / 0.10	0.00 / 0.06	0.06 / 0.09	0.00 / 0.04	0.00 / 0.06	0.02 / 0.05	0.01 / 0.04	0.00 / 0.04	0.03 / 0.06	0.07 / 0.06	0.16 / 0.10	0.04 / 0.05	0.00 / 0.09	0.00 / 0.04
GMB	0.00 / 0.04	0.06 / 0.10	0.00 / 0.06	0.05 / 0.09	0.00 / 0.04	0.00 / 0.06	0.03 / 0.05	0.01 / 0.04	0.00 / 0.04	0.04 / 0.07	0.06 / 0.06	0.15 / 0.10	0.04 / 0.05	0.04 / 0.10	0.00 / 0.04
HND	0.00 / 0.04	0.03 / 0.09	0.00 / 0.06	0.05 / 0.09	0.00 / 0.04	0.03 / 0.06	0.02 / 0.05	0.03 / 0.05	0.00 / 0.04	0.09 / 0.07	0.07 / 0.06	0.11 / 0.10	0.03 / 0.05	0.00 / 0.10	0.00 / 0.04
IDN	0.00 / 0.04	0.03 / 0.10	0.00 / 0.06	0.04 / 0.09	0.06 / 0.06	0.00 / 0.05	0.01 / 0.05	0.01 / 0.05	0.00 / 0.04	0.05 / 0.07	0.05 / 0.06	0.10 / 0.11	0.02 / 0.04	0.01 / 0.08	0.00 / 0.04
IND	0.00 / 0.04	0.06 / 0.10	0.02 / 0.06	0.06 / 0.09	0.08 / 0.06	0.00 / 0.05	0.03 / 0.05	0.00 / 0.04	0.00 / 0.04	0.07 / 0.06	0.04 / 0.05	0.16 / 0.11	0.03 / 0.04	0.04 / 0.10	0.00 / 0.04
IRN	0.00 / 0.04	0.02 / 0.08	0.00 / 0.06	0.05 / 0.09	0.07 / 0.06	0.00 / 0.05	0.01 / 0.05	0.04 / 0.05	0.00 / 0.04	0.09 / 0.07	0.07 / 0.06	0.08 / 0.10	0.02 / 0.04	0.04 / 0.09	0.00 / 0.04
IRQ	0.00 / 0.04	0.02 / 0.09	0.00 / 0.06	0.02 / 0.06	0.10 / 0.06	0.00 / 0.05	0.02 / 0.05	0.02 / 0.05	0.00 / 0.04	0.10 / 0.07	0.09 / 0.06	0.14 / 0.08	0.03 / 0.05	0.09 / 0.09	0.16 / 0.07
ISR	0.00 / 0.04	0.00 / 0.09	0.00 / 0.06	0.03 / 0.06	0.06 / 0.06	0.01 / 0.06	0.00 / 0.04	0.04 / 0.06	0.00 / 0.04	0.05 / 0.07	0.04 / 0.06	0.03 / 0.06	0.02 / 0.05	0.09 / 0.10	0.12 / 0.09
JAM	0.00 / 0.04	0.02 / 0.10	0.00 / 0.07	0.03 / 0.09	0.00 / 0.04	0.00 / 0.06	0.02 / 0.05	0.03 / 0.06	0.00 / 0.04	0.00 / 0.04	0.05 / 0.07	0.08 / 0.10	0.01 / 0.05	0.01 / 0.08	0.00 / 0.04
JOR	0.00 / 0.04	0.00 / 0.07	0.00 / 0.06	0.04 / 0.10	0.02 / 0.06	0.01 / 0.05	0.03 / 0.06	0.04 / 0.06	0.00 / 0.04	0.12 / 0.07	0.06 / 0.06	0.05 / 0.09	0.03 / 0.04	0.07 / 0.09	0.00 / 0.04
JPN	0.00 / 0.04	0.00 / 0.09	0.00 / 0.07	0.04 / 0.07	0.03 / 0.07	0.01 / 0.06	0.02 / 0.07	0.03 / 0.07	0.00 / 0.04	0.04 / 0.07	0.03 / 0.06	0.01 / 0.05	0.00 / 0.04	0.01 / 0.08	0.00 / 0.04
KAZ	0.00 / 0.04	0.02 / 0.10	0.01 / 0.07	0.02 / 0.07	0.00 / 0.04	0.00 / 0.06	0.00 / 0.05	0.00 / 0.04	0.00 / 0.04	0.01 / 0.07	0.06 / 0.07	0.02 / 0.10	0.02 / 0.05	0.04 / 0.10	0.00 / 0.04
KEN	0.00 / 0.04	0.04 / 0.09	0.00 / 0.06	0.07 / 0.09	0.07 / 0.05	0.00 / 0.05	0.04 / 0.05	0.01 / 0.04	0.00 / 0.04	0.09 / 0.06	0.06 / 0.06	0.17 / 0.08	0.04 / 0.05	0.03 / 0.09	0.18 / 0.07
KGZ	0.00 / 0.04	0.02 / 0.09	0.00 / 0.06	0.02 / 0.07	0.00 / 0.04	0.00 / 0.06	0.01 / 0.05	0.01 / 0.05	0.00 / 0.04	0.01 / 0.07	0.06 / 0.07	0.05 / 0.10	0.03 / 0.05	0.01 / 0.10	0.00 / 0.04
KHM	0.00 / 0.04	0.05 / 0.10	0.00 / 0.06	0.07 / 0.09	0.00 / 0.04	0.00 / 0.06	0.01 / 0.05	0.01 / 0.05	0.00 / 0.04	0.00 / 0.04	0.08 / 0.07	0.13 / 0.10	0.03 / 0.05	0.04 / 0.10	0.00 / 0.04
KOR	0.00 / 0.04	0.01 / 0.09	0.00 / 0.07	0.04 / 0.07	0.00 / 0.04	0.01 / 0.06	0.00 / 0.07	0.03 / 0.07	0.00 / 0.04	0.04 / 0.08	0.03 / 0.08	0.00 / 0.04	0.00 / 0.04	0.03 / 0.10	0.00 / 0.04
LAO	0.00 / 0.04	0.07 / 0.11	0.00 / 0.06	0.06 / 0.09	0.00 / 0.04	0.00 / 0.06	0.01 / 0.05	0.01 / 0.04	0.00 / 0.04	0.00 / 0.04	0.07 / 0.07	0.12 / 0.10	0.04 / 0.05	0.03 / 0.11	0.00 / 0.04
LBR	0.00 / 0.04	0.05 / 0.10	0.00 / 0.06	0.06 / 0.09	0.00 / 0.04	0.00 / 0.06	0.05 / 0.05	0.01 / 0.04	0.00 / 0.04	0.03 / 0.06	0.09 / 0.07	0.16 / 0.10	0.04 / 0.05	0.01 / 0.10	0.00 / 0.04
LKA	0.00 / 0.04	0.03 / 0.10	0.00 / 0.06	0.05 / 0.09	0.06 / 0.06	0.00 / 0.05	0.01 / 0.05	0.01 / 0.05	0.00 / 0.04	0.04 / 0.07	0.06 / 0.06	0.08 / 0.11	0.02 / 0.04	0.01 / 0.08	0.00 / 0.04
LSO	0.00 / 0.04	0.04 / 0.10	0.00 / 0.06	0.06 / 0.09	0.00 / 0.04	0.00 / 0.06	0.05 / 0.06	0.01 / 0.05	0.00 / 0.04	0.01 / 0.06	0.09 / 0.07	0.13 / 0.10	0.03 / 0.05	0.00 / 0.08	0.00 / 0.04
MAR	0.00 / 0.04	0.04 / 0.10	0.00 / 0.06	0.05 / 0.09	0.01 / 0.06	0.02 / 0.05	0.00 / 0.04	0.04 / 0.05	0.00 / 0.04	0.04 / 0.06	0.07 / 0.07	0.11 / 0.11	0.02 / 0.04	0.02 / 0.08	0.00 / 0.04
MDG	0.00 / 0.04	0.09 / 0.11	0.00 / 0.06	0.07 / 0.09	0.00 / 0.04	0.00 / 0.06	0.06 / 0.05	0.01 / 0.04	0.00 / 0.04	0.02 / 0.06	0.07 / 0.06	0.16 / 0.10	0.05 / 0.05	0.00 / 0.09	0.00 / 0.04
MEX	0.00 / 0.04	0.02 / 0.08	0.00 / 0.06	0.05 / 0.09	0.02 / 0.05	0.03 / 0.05	0.01 / 0.05	0.04 / 0.05	0.00 / 0.04	0.08 / 0.06	0.07 / 0.07	0.08 / 0.08	0.01 / 0.04	0.02 / 0.09	0.12 / 0.07
MLI	0.00 / 0.04	0.08 / 0.10	0.00 / 0.05	0.05 / 0.08	0.10 / 0.06	0.00 / 0.05	0.01 / 0.04	0.01 / 0.04	0.00 / 0.04	0.09 / 0.06	0.07 / 0.05	0.22 / 0.09	0.06 / 0.05	0.03 / 0.10	0.16 / 0.07
MNG	0.00 / 0.04	0.03 / 0.10	0.00 / 0.06	0.07 / 0.10	0.00 / 0.04	0.01 / 0.06	0.01 / 0.05	0.01 / 0.05	0.00 / 0.04	0.00 / 0.04	0.07 / 0.07	0.08 / 0.10	0.02 / 0.05	0.00 / 0.08	0.00 / 0.04
MOZ	0.00 / 0.04	0.08 / 0.10	0.00 / 0.06	0.06 / 0.08	0.09 / 0.06	0.00 / 0.05	0.05 / 0.05	0.01 / 0.04	0.00 / 0.04	0.10 / 0.06	0.05 / 0.05	0.21 / 0.09	0.05 / 0.05	0.03 / 0.10	0.16 / 0.07
MRT	0.00 / 0.04	0.03 / 0.09	0.00 / 0.06	0.06 / 0.09	0.00 / 0.05	0.00 / 0.05	0.01 / 0.04	0.01 / 0.04	0.00 / 0.04	0.08 / 0.07	0.07 / 0.07	0.14 / 0.10	0.05 / 0.05	0.12 / 0.09	0.00 / 0.04
MUS	0.00 / 0.04	0.01 / 0.11	0.00 / 0.07	0.02 / 0.08	0.00 / 0.04	0.00 / 0.06	0.01 / 0.06	0.01 / 0.06	0.00 / 0.04	0.00 / 0.04	0.04 / 0.08	0.04 / 0.09	0.00 / 0.04	0.01 / 0.09	0.00 / 0.04
MWI	0.00 / 0.04	0.07 / 0.10	0.00 / 0.06	0.06 / 0.09	0.00 / 0.04	0.00 / 0.06	0.02 / 0.05	0.01 / 0.04	0.00 / 0.04	0.06 / 0.07	0.06 / 0.06	0.15 / 0.10	0.05 / 0.05	0.01 / 0.10	0.00 / 0.04
MYS	0.00 / 0.04	0.01 / 0.09	0.00 / 0.06	0.05 / 0.10	0.02 / 0.06	0.00 / 0.05	0.01 / 0.05	0.01 / 0.05	0.00 / 0.04	0.07 / 0.07	0.04 / 0.06	0.04 / 0.10	0.02 / 0.05	0.00 / 0.08	0.00 / 0.04
NAM	0.00 / 0.04	0.03 / 0.09	0.00 / 0.06	0.06 / 0.10	0.00 / 0.04	0.00 / 0.06	0.03 / 0.05	0.01 / 0.05	0.00 / 0.04	0.04 / 0.07	0.05 / 0.06	0.13 / 0.10	0.04 / 0.05	0.05 / 0.10	0.00 / 0.04
NER	0.00 / 0.04	0.08 / 0.10	0.00 / 0.06	0.07 / 0.09	0.09 / 0.05	0.00 / 0.05	0.02 / 0.04	0.01 / 0.04	0.00 / 0.04	0.10 / 0.06	0.07 / 0.06	0.22 / 0.09	0.05 / 0.05	0.09 / 0.10	0.16 / 0.07
NGA	0.00 / 0.04	0.04 / 0.09	0.00 / 0.06	0.06 / 0.09	0.09 / 0.06	0.00 / 0.05	0.02 / 0.04	0.01 / 0.04	0.00 / 0.04	0.10 / 0.06	0.06 / 0.05	0.19 / 0.09	0.05 / 0.05	0.02 / 0.10	0.16 / 0.07
NIC	0.00 / 0.04	0.03 / 0.09	0.00 / 0.06	0.05 / 0.09	0.00 / 0.04	0.03 / 0.06	0.03 / 0.05	0.03 / 0.05	0.00 / 0.04	0.01 / 0.06	0.07 / 0.07	0.10 / 0.10	0.02 / 0.04	0.00 / 0.10	0.00 / 0.04
NOR	0.00 / 0.04	0.00 / 0.08	0.00 / 0.07	0.03 / 0.09	0.04 / 0.07	0.02 / 0.06	0.01 / 0.06	0.01 / 0.07	0.00 / 0.04	0.07 / 0.08	0.02 / 0.05	0.02 / 0.06	0.01 / 0.04	0.00 / 0.09	0.00 / 0.04
NPL	0.00 / 0.04	0.07 / 0.11	0.00 / 0.06	0.06 / 0.08	0.05 / 0.06	0.00 / 0.05	0.01 / 0.04	0.01 / 0.04	0.00 / 0.04	0.04 / 0.06	0.07 / 0.06	0.15 / 0.11	0.05 / 0.04	0.01 / 0.10	0.00 / 0.04
NZL	0.00 / 0.04	0.01 / 0.08	0.00 / 0.07	0.03 / 0.09	0.04 / 0.07	0.00 / 0.06	0.01 / 0.06	0.06 / 0.07	0.00 / 0.04	0.02 / 0.08	0.03 / 0.06	0.02 / 0.06	0.01 / 0.04	0.00 / 0.08	0.00 / 0.04
OMN	0.00 / 0.04	0.00 / 0.08	0.00 / 0.07	0.05 / 0.10	0.00 / 0.04	0.00 / 0.06	0.02 / 0.06	0.04 / 0.06	0.00 / 0.04	0.01 / 0.06	0.06 / 0.07	0.03 / 0.09	0.00 / 0.04	0.06 / 0.07	0.00 / 0.04
PAK	0.00 / 0.04	0.05 / 0.10	0.01 / 0.06	0.06 / 0.09	0.10 / 0.06	0.00 / 0.05	0.03 / 0.05	0.01 / 0.04	0.00 / 0.04	0.09 / 0.06	0.06 / 0.05	0.19 / 0.11	0.03 / 0.04	0.10 / 0.10	0.00 / 0.04
PAN	0.00 / 0.04	0.02 / 0.08	0.00 / 0.06	0.05 / 0.09	0.00 / 0.04	0.03 / 0.06	0.01 / 0.05	0.03 / 0.06	0.00 / 0.04	0.09 / 0.07	0.06 / 0.07	0.03 / 0.09	0.02 / 0.05	0.00 / 0.09	0.00 / 0.04
PER	0.00 / 0.04	0.03 / 0.09	0.00 / 0.06	0.05 / 0.09	0.05 / 0.06	0.00 / 0.05	0.01 / 0.05	0.03 / 0.05	0.00 / 0.04	0.11 / 0.07	0.06 / 0.06	0.10 / 0.10	0.02 / 0.04	0.01 / 0.09	0.00 / 0.04
PHL	0.00 / 0.04	0.03 / 0.10	0.00 / 0.06	0.05 / 0.08	0.07 / 0.06	0.00 / 0.05	0.01 / 0.04	0.01 / 0.05	0.00 / 0.04	0.06 / 0.06	0.05 / 0.06	0.12 / 0.09	0.02 / 0.05	0.01 / 0.08	0.12 / 0.07
PRY	0.00 / 0.04	0.03 / 0.10	0.00 / 0.06	0.02 / 0.07	0.02 / 0.06	0.00 / 0.06	0.02 / 0.05	0.00 / 0.04	0.00 / 0.04	0.04 / 0.07	0.06 / 0.07	0.08 / 0.10	0.02 / 0.04	0.04 / 0.10	0.00 / 0.04
QAT	0.00 / 0.04	0.00 / 0.08	0.00 / 0.07	0.03 / 0.09	0.00 / 0.04	0.00 / 0.06	0.01 / 0.06	0.04 / 0.06	0.00 / 0.04	0.01 / 0.06	0.05 / 0.07	0.02 / 0.09	0.00 / 0.04	0.06 / 0.09	0.00 / 0.04
RUS	0.00 / 0.04	0.04 / 0.08	0.07 / 0.07	0.04 / 0.10	0.04 / 0.06	0.02 / 0.05	0.01 / 0.05	0.00 / 0.04	0.00 / 0.04	0.09 / 0.07	0.07 / 0.06	0.05 / 0.10	0.00 / 0.04	0.00 / 0.09	0.00 / 0.04
RWA	0.00 / 0.04	0.06 / 0.10	0.00 / 0.06	0.05 / 0.08	0.01 / 0.06	0.00 / 0.05	0.05 / 0.05	0.01 / 0.04	0.00 / 0.04	0.07 / 0.07	0.05 / 0.06	0.15 / 0.09	0.04 / 0.05	0.02 / 0.10	0.00 / 0.04
SAU	0.00 / 0.04	0.00 / 0.07	0.00 / 0.07	0.04 / 0.09	0.03 / 0.05	0.00 / 0.05	0.01 / 0.06	0.04 / 0.06	0.00 / 0.04	0.04 / 0.06	0.05 / 0.08	0.02 / 0.06	0.00 / 0.04	0.06 / 0.07	0.18 / 0.09
SDN	0.00 / 0.04	0.05 / 0.09	0.00 / 0.06	0.07 / 0.09	0.00 / 0.04	0.00 / 0.05	0.02 / 0.05	0.01 / 0.04	0.00 / 0.04	0.12 / 0.07	0.08 / 0.07	0.15 / 0.08	0.04 / 0.05	0.12 / 0.09	0.16 / 0.07
SEN	0.00 / 0.04	0.03 / 0.09	0.00 / 0.06	0.05 / 0.10	0.01 / 0.06	0.00 / 0.05	0.01 / 0.04	0.01 / 0.04	0.00 / 0.04	0.05 / 0.06	0.06 / 0.06	0.16 / 0.10	0.04 / 0.05	0.03 / 0.09	0.00 / 0.04
SGP	0.00 / 0.04	0.00 / 0.10	0.00 / 0.08	0.04 / 0.07	0.00 / 0.04	0.00 / 0.06	0.01 / 0.08	0.01 / 0.08	0.00 / 0.04	0.00 / 0.04	0.01 / 0.08	0.00 / 0.04	0.00 / 0.04	0.04 / 0.09	0.00 / 0.04
SLE	0.00 / 0.04	0.05 / 0.10	0.00 / 0.06	0.07 / 0.09	0.00 / 0.04	0.00 / 0.06	0.04 / 0.05	0.01 / 0.04	0.00 / 0.04	0.03 / 0.07	0.06 / 0.06	0.16 / 0.10	0.04 / 0.05	0.00 / 0.08	0.00 / 0.04
SLV	0.00 / 0.04	0.02 / 0.09	0.00 / 0.06	0.04 / 0.09	0.00 / 0.04	0.03 / 0.06	0.01 / 0.05	0.03 / 0.06	0.00 / 0.04	0.07 / 0.07	0.07 / 0.07	0.09 / 0.10	0.01 / 0.04	0.03 / 0.10	0.00 / 0.04
SWZ	0.00 / 0.04	0.01 / 0.08	0.00 / 0.06	0.05 / 0.10	0.01 / 0.06	0.00 / 0.05	0.02 / 0.05	0.01 / 0.05	0.00 / 0.04	0.03 / 0.06	0.07 / 0.07	0.12 / 0.10	0.02 / 0.04	0.04 / 0.09	0.00 / 0.04
TCD	0.00 / 0.04	0.08 / 0.10	0.00 / 0.06	0.08 / 0.08	0.07 / 0.05	0.00 / 0.05	0.05 / 0.05	0.01 / 0.04	0.00 / 0.04	0.11 / 0.06	0.09 / 0.06	0.21 / 0.08	0.05 / 0.05	0.04 / 0.10	0.16 / 0.07
TGO	0.00 / 0.04	0.04 / 0.09	0.00 / 0.06	0.06 / 0.10	0.06 / 0.06	0.00 / 0.05	0.03 / 0.05	0.01 / 0.04	0.00 / 0.04	0.04 / 0.06	0.09 / 0.06	0.17 / 0.10	0.04 / 0.04	0.01 / 0.10	0.00 / 0.04
THA	0.00 / 0.04	0.04 / 0.11	0.01 / 0.06	0.02 / 0.08	0.06 / 0.06	0.00 / 0.05	0.02 / 0.05	0.00 / 0.04	0.00 / 0.04	0.06 / 0.07	0.06 / 0.06	0.07 / 0.10	0.02 / 0.04	0.04 / 0.10	0.00 / 0.04
TJK	0.00 / 0.04	0.05 / 0.10	0.00 / 0.06	0.03 / 0.06	0.04 / 0.06	0.00 / 0.06	0.01 / 0.05	0.01 / 0.04	0.00 / 0.04	0.04 / 0.07	0.07 / 0.06	0.11 / 0.11	0.03 / 0.04	0.02 / 0.10	0.00 / 0.04
TTO	0.00 / 0.04	0.00 / 0.09	0.00 / 0.07	0.03 / 0.08	0.00 / 0.04	0.00 / 0.06	0.01 / 0.06	0.03 / 0.06	0.00 / 0.04	0.07 / 0.07	0.06 / 0.07	0.03 / 0.09	0.01 / 0.04	0.00 / 0.08	0.00 / 0.04
TUN	0.00 / 0.04	0.02 / 0.09	0.00 / 0.06	0.04 / 0.09	0.05 / 0.06	0.02 / 0.05	0.00 / 0.04	0.04 / 0.05	0.00 / 0.04	0.04 / 0.06	0.07 / 0.06	0.07 / 0.11	0.02 / 0.04	0.05 / 0.09	0.00 / 0.04
TZA	0.00 / 0.04	0.08 / 0.10	0.00 / 0.06	0.07 / 0.09	0.05 / 0.06	0.00 / 0.05	0.03 / 0.05	0.01 / 0.04	0.00 / 0.04	0.07 / 0.07	0.06 / 0.06	0.17 / 0.10	0.06 / 0.05	0.01 / 0.10	0.00 / 0.04
UGA	0.00 / 0.04	0.07 / 0.10	0.00 / 0.06	0.07 / 0.08	0.04 / 0.05	0.00 / 0.05	0.05 / 0.05	0.01 / 0.04	0.00 / 0.04	0.10 / 0.07	0.08 / 0.06	0.17 / 0.08	0.06 / 0.05	0.02 / 0.10	0.16 / 0.07
URY	0.00 / 0.04	0.01 / 0.08	0.00 / 0.06	0.04 / 0.09	0.01 / 0.06	0.00 / 0.05	0.01 / 0.05	0.03 / 0.06	0.00 / 0.04	0.06 / 0.07	0.04 / 0.07	0.04 / 0.10	0.00 / 0.04	0.03 / 0.09	0.00 / 0.04
USA	0.00 / 0.04	0.06 / 0.08	0.12 / 0.08	0.03 / 0.09	0.06 / 0.07	0.03 / 0.06	0.00 / 0.04	0.00 / 0.04	0.00 / 0.04	0.09 / 0.08	0.03 / 0.06	0.03 / 0.06	0.00 / 0.04	0.01 / 0.10	0.00 / 0.04
VNM	0.00 / 0.04	0.04 / 0.10	0.01 / 0.06	0.05 / 0.09	0.00 / 0.06	0.00 / 0.06	0.01 / 0.05	0.01 / 0.04	0.00 / 0.04	0.00 / 0.04	0.05 / 0.07	0.08 / 0.10	0.03 / 0.05	0.05 / 0.10	0.00 / 0.04
ZAF	0.00 / 0.04	0.03 / 0.09	0.00 / 0.06	0.04 / 0.08	0.01 / 0.04	0.00 / 0.05	0.01 / 0.05	0.00 / 0.04	0.00 / 0.04	0.07 / 0.07	0.05 / 0.07	0.08 / 0.08	0.02 / 0.05	0.03 / 0.10	0.14 / 0.08
ZMB	0.00 / 0.04	0.07 / 0.10	0.00 / 0.06	0.07 / 0.09	0.00 / 0.04	0.00 / 0.06	0.04 / 0.05	0.01 / 0.04	0.00 / 0.04	0.06 / 0.07	0.06 / 0.06	0.14 / 0.09	0.05 / 0.05	0.01 / 0.10	0.00 / 0.04
ZWE	0.00 / 0.04	0.07 / 0.10	0.00 / 0.06	0.06 / 0.09	0.00 / 0.04	0.00 / 0.06	0.05 / 0.05	0.01 / 0.04	0.00 / 0.04	0.07 / 0.07	0.06 / 0.06	0.12 / 0.09	0.03 / 0.05	0.04 / 0.10	0.00 / 0.04

## Sheet: NodeNames
Names	Abbreviations
CC	Variable climatic conditions
HT	Higher temperatures
DFS	Droughts, floods, storms
Water	RWA
Agriculture	DAL
Food Insecurity & Inflation	FI
Infrastructure & Economy	DIE
Livelihoods	LL
Human mobility	IMD
Urbanization	RU
Violent conflict & unrest	VCU
State Response	ISR
Extremist groups	EG
Geopolitical tensions	GT
Crop Exports	DE
Food price spikes	FPS
Equity & asset values, dividends	EQL
