# Supplementary material for: Critical intervention points for European adaptation to cascading climate change impacts
Source: Research Square preprint supplement (doi:10.21203/rs.3.rs-6165925/v1), 2025-03-20
Supplement: Supplementary file 2 [file cf9dc4d09f0d171a47b56364.xlsx]

## Sheet: SupplementaryTable1
## Importance values of the PageRank analysis for the 102 non-EU27 countries (definitions of indicator abbreviations in the headers of the third to final columns can be found in Table SI 4: Standardization and coding of impact cascade diagrams). ## The second column ‘cluster’ shows the final cluster a country was assigned to in the consensus clustering. The top row provides abbreviations for the …
Country	RWA	GT	FPS	FI	DE	DIE	DAL	ISR	LL	IMD	EUD	RU	VCU	EG	EUS	EQL	BAN
AGO	0.0987394	0.0372537	0.0406844	0.0491776	0.0555898	0.0863975	0.0993807	0.0680628	0.0961703	0.0645152	0.0372537	0.0467946	0.0372537	0.0542017	0.0372537	0.0540178	0.0372537
ALB	0.104211	0.0381183	0.0470856	0.0489936	0.0593078	0.0754721	0.108749	0.0700856	0.0963271	0.0653295	0.0381183	0.0404574	0.0381183	0.0381183	0.0381183	0.0552715	0.0381183
ARE	0.0731855	0.0396846	0.0697743	0.0691252	0.0713511	0.085706	0.0744457	0.0654237	0.0489602	0.0784027	0.0396846	0.0463539	0.0396846	0.0613052	0.0396846	0.0575431	0.0396846
ARG	0.0932578	0.038249	0.038249	0.0505608	0.0756266	0.0740191	0.0839928	0.0638397	0.099768	0.0715129	0.038249	0.0420451	0.038249	0.0604221	0.038249	0.0554612	0.038249
ARM	0.100777	0.0376734	0.0464909	0.060812	0.0585943	0.0455882	0.102561	0.0942674	0.061975	0.0601783	0.0376734	0.0376734	0.0880889	0.0376734	0.0376734	0.0546264	0.0376734
AUS	0.0774402	0.0398011	0.0398011	0.0691265	0.0849911	0.0876505	0.0836434	0.065167	0.0525507	0.0764831	0.0398011	0.0417146	0.0398011	0.064715	0.0398011	0.0577115	0.0398011
AZE	0.0988279	0.0378043	0.0443939	0.0494263	0.0577857	0.0522949	0.0978033	0.083013	0.0729754	0.0664108	0.0378043	0.0479737	0.0852573	0.0378043	0.0378043	0.0548161	0.0378043
BDI	0.101809	0.0372199	0.0396634	0.0486868	0.0550707	0.0820527	0.10631	0.0580992	0.100871	0.064617	0.0372199	0.04545	0.0372199	0.0573029	0.0372199	0.0539689	0.0372199
BEN	0.0945982	0.0374895	0.0427302	0.0420696	0.056721	0.0994485	0.0894189	0.0567826	0.111589	0.0612628	0.0374895	0.0447236	0.0374895	0.0588487	0.0374895	0.0543599	0.0374895
BFA	0.0977592	0.0371657	0.0397124	0.0442018	0.0550676	0.0840549	0.0974858	0.0522468	0.0908125	0.065139	0.0371657	0.0493382	0.0652188	0.0564103	0.0371657	0.0538901	0.0371657
BGD	0.0982832	0.0372611	0.0433353	0.0466797	0.0567683	0.0871357	0.0983429	0.0575581	0.102606	0.0664037	0.0372611	0.0442676	0.0372611	0.0582849	0.0372611	0.0540287	0.0372611
BHR	0.0992413	0.0365801	0.0645008	0.0629355	0.0656055	0.0604486	0.10267	0.0712989	0.0803712	0.0646604	0.0365801	0.0365801	0.0365801	0.0557463	0.0365801	0.053041	0.0365801
BLR	0.104862	0.0390005	0.0536442	0.0515225	0.0634555	0.0507141	0.10736	0.073362	0.0962035	0.0685834	0.0390005	0.0397394	0.0390005	0.0390005	0.0390005	0.0565507	0.0390005
BOL	0.0963753	0.0383031	0.0529242	0.0506511	0.0621375	0.0901046	0.0907459	0.0666393	0.0958599	0.0647646	0.0383031	0.0444396	0.0383031	0.0383031	0.0383031	0.0555395	0.0383031
BRA	0.0900836	0.0370933	0.0370933	0.0457318	0.0703478	0.0890001	0.0806617	0.0783864	0.0791073	0.0635663	0.0370933	0.0446775	0.077937	0.0412484	0.0370933	0.0537854	0.0370933
BWA	0.0988535	0.0384149	0.0459135	0.0524451	0.0591238	0.0917383	0.0958929	0.0640883	0.0957256	0.0627131	0.0384149	0.047315	0.0384149	0.0384149	0.0384149	0.0557016	0.0384149
CAF	0.0819698	0.0377291	0.0409442	0.0525687	0.056154	0.0834006	0.0983115	0.0677079	0.0798348	0.0653824	0.0377291	0.0492606	0.0711567	0.0476854	0.0377291	0.0547071	0.0377291
CAN	0.0925726	0.0391554	0.0391554	0.0654575	0.0852731	0.0885768	0.079551	0.0584488	0.0554151	0.0758318	0.0391554	0.0423478	0.0391554	0.0648178	0.0391554	0.0567753	0.0391554
CHE	0.100189	0.0387154	0.0621556	0.0623451	0.0691414	0.0639774	0.0978929	0.0525102	0.0575658	0.0761963	0.0387154	0.0445745	0.0387154	0.0637372	0.0387154	0.0561376	0.0387154
CHL	0.0887226	0.037269	0.0579743	0.052083	0.0634902	0.0969973	0.077072	0.0514374	0.0978751	0.0704989	0.037269	0.0403011	0.037269	0.0631627	0.037269	0.0540404	0.037269
CHN	0.100415	0.0384565	0.041055	0.0447283	0.0595926	0.0917057	0.0992294	0.0641122	0.10499	0.0602596	0.0384565	0.0474118	0.0384565	0.0384565	0.0384565	0.055762	0.0384565
CMR	0.0954334	0.0371933	0.0410477	0.0424289	0.0556669	0.0874249	0.0922283	0.0548498	0.09047	0.0650391	0.0371933	0.0486267	0.0678582	0.0562226	0.0371933	0.0539302	0.0371933
COD	0.0964222	0.0371495	0.040842	0.0503812	0.0555673	0.084783	0.0945665	0.0598335	0.0819221	0.0647936	0.0371495	0.0485508	0.0667797	0.053093	0.0371495	0.0538668	0.0371495
COG	0.0989734	0.0384189	0.0439786	0.053963	0.0582262	0.0917663	0.0961462	0.0655867	0.09133	0.06798	0.0384189	0.0458283	0.0384189	0.0384189	0.0384189	0.0557075	0.0384189
COL	0.0903132	0.0370445	0.0529432	0.0461747	0.0609185	0.0869211	0.0813298	0.0571797	0.0838829	0.0647548	0.0370445	0.0439382	0.0696638	0.0600878	0.0370445	0.0537145	0.0370445
CRI	0.080639	0.0388036	0.0569372	0.0535117	0.0644437	0.0854455	0.0929659	0.065369	0.0901272	0.0743129	0.0388036	0.0471613	0.0388036	0.0388036	0.0388036	0.0562651	0.0388036
DJI	0.0695976	0.0381012	0.0575616	0.0480023	0.0640055	0.109458	0.0699932	0.0628646	0.105437	0.0648523	0.0381012	0.0422736	0.0381012	0.0602017	0.0381012	0.055247	0.0381012
DOM	0.0767976	0.0389672	0.0582355	0.0496828	0.0652232	0.0951386	0.084067	0.0666748	0.0965702	0.0709745	0.0389672	0.04633	0.0389672	0.0389672	0.0389672	0.0565024	0.0389672
DZA	0.0889697	0.0374131	0.0520395	0.0374131	0.0608386	0.102189	0.0771555	0.0581944	0.112286	0.0672082	0.0374131	0.0431542	0.0374131	0.0592365	0.0374131	0.0542491	0.0374131
ECU	0.0810656	0.0377082	0.0524102	0.0527571	0.0613079	0.0835349	0.0963494	0.0631688	0.0961142	0.0685463	0.0377082	0.0429846	0.0377082	0.0585429	0.0377082	0.054677	0.0377082
EGY	0.0913377	0.0370529	0.0509322	0.0399677	0.0600651	0.0862194	0.0835809	0.0595917	0.0899396	0.0631789	0.0370529	0.0445078	0.0702137	0.0585271	0.0370529	0.0537266	0.0370529
ETH	0.0811762	0.0377586	0.0409046	0.0482943	0.0561699	0.0852795	0.096482	0.0591077	0.0838846	0.06832	0.0377586	0.0556524	0.0712178	0.0477268	0.0377586	0.0547499	0.0377586
GAB	0.0988776	0.038459	0.0447092	0.0512846	0.0585863	0.0933378	0.0958045	0.0658242	0.0976589	0.0616899	0.038459	0.0457071	0.038459	0.038459	0.038459	0.0557657	0.038459
GBR	0.0996849	0.0386633	0.0626971	0.0635141	0.0703819	0.0638914	0.0969394	0.0552238	0.0568038	0.0748198	0.0386633	0.0416831	0.0386633	0.0649822	0.0386633	0.0560621	0.0386633
GHA	0.0993614	0.0384719	0.0423929	0.0407712	0.057607	0.0933246	0.0968384	0.0630181	0.10628	0.06524	0.0384719	0.0485505	0.0384719	0.0384719	0.0384719	0.0557843	0.0384719
GIN	0.0854012	0.0391077	0.0422804	0.0457902	0.0581431	0.0915593	0.102875	0.064901	0.104698	0.0644884	0.0391077	0.0485115	0.0391077	0.0391077	0.0391077	0.0567062	0.0391077
GMB	0.102207	0.0383463	0.0424289	0.049919	0.0574407	0.0858626	0.103565	0.0625191	0.0966365	0.0650563	0.0383463	0.0486853	0.0383463	0.0383463	0.0383463	0.0556022	0.0383463
HND	0.0961318	0.0382714	0.0532951	0.0492166	0.0622788	0.0891833	0.0903064	0.0648599	0.0952239	0.0682548	0.0382714	0.0461271	0.0382714	0.0382714	0.0382714	0.0554935	0.0382714
IDN	0.0814501	0.037921	0.0465495	0.0458581	0.0592375	0.0909734	0.0967313	0.0557	0.108501	0.0659155	0.037921	0.04258	0.037921	0.0619136	0.037921	0.0549856	0.037921
IND	0.100658	0.037272	0.037272	0.0463756	0.0605056	0.0851695	0.103585	0.0503515	0.107237	0.0642729	0.037272	0.0420881	0.037272	0.0620807	0.037272	0.0540445	0.037272
IRN	0.0914896	0.0372431	0.0541837	0.0465801	0.0616318	0.0932481	0.0833039	0.057801	0.10226	0.0680947	0.0372431	0.0404437	0.0372431	0.0607454	0.0372431	0.0540026	0.0372431
IRQ	0.0946107	0.0379051	0.052348	0.0505534	0.0614664	0.0601781	0.0881044	0.0632417	0.0811344	0.0651114	0.0379051	0.0458293	0.0724314	0.0584081	0.0379051	0.0549623	0.0379051
ISR	0.0967561	0.0381389	0.0550269	0.0381389	0.0629569	0.0630246	0.0921183	0.0588024	0.056514	0.0670937	0.0381389	0.0494202	0.0883964	0.0638944	0.0381389	0.0553013	0.0381389
JAM	0.0831146	0.0402855	0.0585561	0.0526489	0.06664	0.0903908	0.0951767	0.071229	0.0962325	0.0402855	0.0402855	0.045599	0.0402855	0.0402855	0.0402855	0.058414	0.0402855
JOR	0.0864448	0.0371926	0.0614681	0.0565299	0.0648677	0.0963921	0.072257	0.0635628	0.0881255	0.0703142	0.0371926	0.043364	0.0371926	0.0567812	0.0371926	0.0539297	0.0371926
JPN	0.0804748	0.0393865	0.0679592	0.0673557	0.0701518	0.0710178	0.0913083	0.0621539	0.0549592	0.0748351	0.0393865	0.0393865	0.0393865	0.0663546	0.0393865	0.0571108	0.0393865
KAZ	0.100433	0.0394847	0.0394847	0.0466851	0.0652306	0.0722487	0.095956	0.0680044	0.104116	0.0671792	0.0394847	0.0465015	0.0394847	0.0394847	0.0394847	0.0572529	0.0394847
KEN	0.0943254	0.0371611	0.0426199	0.0496071	0.0564731	0.087314	0.0898699	0.0568742	0.0810452	0.064765	0.0371611	0.049784	0.0707443	0.0540502	0.0371611	0.0538835	0.0371611
KGZ	0.0997184	0.0393577	0.0505142	0.0533558	0.062095	0.0684771	0.0947773	0.0662713	0.0972201	0.0664902	0.0393577	0.0478659	0.0393577	0.0393577	0.0393577	0.0570686	0.0393577
KHM	0.102766	0.0398568	0.0456077	0.0465576	0.060777	0.0926335	0.0999428	0.0673628	0.0993405	0.0398568	0.0398568	0.048222	0.0398568	0.0398568	0.0398568	0.0577924	0.0398568
KOR	0.0994858	0.0397803	0.0697242	0.0737921	0.0712723	0.0657368	0.0929002	0.0755825	0.0397803	0.0755825	0.0397803	0.0397803	0.0397803	0.0397803	0.0397803	0.0576814	0.0397803
LAO	0.106088	0.0397738	0.0441238	0.0470983	0.0597328	0.0857216	0.107593	0.0665861	0.0982097	0.0397738	0.0397738	0.048758	0.0397738	0.0397738	0.0397738	0.057672	0.0397738
LBR	0.0998931	0.0384375	0.0434262	0.0529004	0.0579823	0.0915313	0.0981302	0.0654004	0.0951132	0.0631945	0.0384375	0.0460686	0.0384375	0.0384375	0.0384375	0.0557345	0.0384375
LKA	0.0832499	0.0378635	0.0456592	0.0471729	0.0585454	0.0870592	0.100858	0.0574661	0.106319	0.0656953	0.0378635	0.0426254	0.0378635	0.06113	0.0378635	0.0549022	0.0378635
LSO	0.0832241	0.0391234	0.0457151	0.0554733	0.0597388	0.0942997	0.0980019	0.066886	0.0962609	0.0623592	0.0391234	0.0465719	0.0391234	0.0391234	0.0391234	0.056729	0.0391234
MAR	0.080687	0.0377906	0.0500832	0.0411051	0.0603369	0.0869397	0.095323	0.0694489	0.108171	0.0639771	0.0377906	0.0441217	0.0377906	0.0560575	0.0377906	0.0547963	0.0377906
MDG	0.0865283	0.039065	0.0421495	0.0538548	0.0580329	0.0889066	0.105474	0.0639845	0.0966598	0.0640712	0.039065	0.0493042	0.039065	0.039065	0.039065	0.0566444	0.039065
MEX	0.0890335	0.0370097	0.0536347	0.0455278	0.0618085	0.0868864	0.0785993	0.0743647	0.0806775	0.0632245	0.0370097	0.0436939	0.0749129	0.0459332	0.0370097	0.0536641	0.0370097
MLI	0.0986498	0.0371199	0.0396892	0.0415996	0.0549833	0.0814341	0.0996124	0.05499	0.0926588	0.0642118	0.0371199	0.0489982	0.0654839	0.0553857	0.0371199	0.0538237	0.0371199
MNG	0.0839203	0.0405867	0.0489649	0.0486003	0.0626333	0.0983028	0.0962978	0.0700449	0.100622	0.0405867	0.0405867	0.0476566	0.0405867	0.0405867	0.0405867	0.0588508	0.0405867
MOZ	0.0982819	0.0371254	0.039987	0.0479871	0.0551892	0.0820108	0.0987768	0.0532258	0.0862543	0.0648586	0.0371254	0.0497107	0.0661568	0.0552278	0.0371254	0.0538317	0.0371254
MRT	0.0949968	0.0373479	0.0427103	0.0445244	0.0565687	0.0937003	0.0907607	0.0676196	0.100594	0.0662394	0.0373479	0.0468897	0.0373479	0.0545016	0.0373479	0.0541545	0.0373479
MUS	0.0883954	0.0399281	0.057426	0.0580747	0.0660483	0.0775209	0.107707	0.0753907	0.0916433	0.0399281	0.0399281	0.0404009	0.0399281	0.0399281	0.0399281	0.0578958	0.0399281
MWI	0.101664	0.0383796	0.0415479	0.0475085	0.0570852	0.087628	0.102252	0.062381	0.0981987	0.0668863	0.0383796	0.0489199	0.0383796	0.0383796	0.0383796	0.0556505	0.0383796
MYS	0.0762935	0.037891	0.0518785	0.0517681	0.0616035	0.0950306	0.0853396	0.0633898	0.0960042	0.0713477	0.037891	0.0452363	0.037891	0.0577109	0.037891	0.0549422	0.037891
NAM	0.0967538	0.0384825	0.0457741	0.0494837	0.0590924	0.0963258	0.091009	0.0627117	0.0971202	0.0661466	0.0384825	0.0488877	0.0384825	0.0384825	0.0384825	0.0557997	0.0384825
NER	0.0972208	0.037182	0.0397644	0.0433917	0.055076	0.0852101	0.0962367	0.055616	0.0913192	0.0642758	0.037182	0.048904	0.0654614	0.054882	0.037182	0.0539138	0.037182
NGA	0.0951774	0.037194	0.0418516	0.0443442	0.0561109	0.0877085	0.0916571	0.0542103	0.0894334	0.0644158	0.037194	0.0484852	0.0671192	0.056779	0.037194	0.0539313	0.037194
NIC	0.0962546	0.0383374	0.0532311	0.0512458	0.0623027	0.0914893	0.0903672	0.0662942	0.0977216	0.0605953	0.0383374	0.0448843	0.0383374	0.0383374	0.0383374	0.0555893	0.0383374
NOR	0.0905839	0.039098	0.0650204	0.0633787	0.0683914	0.08789	0.0753137	0.0539566	0.0581254	0.0763435	0.039098	0.0436686	0.039098	0.0651456	0.039098	0.0566924	0.039098
NPL	0.101674	0.037207	0.0408944	0.042002	0.0556127	0.0817008	0.106051	0.05794	0.1085	0.0630759	0.037207	0.0449683	0.037207	0.0575963	0.037207	0.0539502	0.037207
NZL	0.0752593	0.0397092	0.067241	0.0649101	0.0699779	0.0858771	0.0790005	0.0560016	0.0586473	0.0770615	0.0397092	0.0432946	0.0397092	0.0666043	0.0397092	0.0575787	0.0397092
OMN	0.0729641	0.0390146	0.0645221	0.0601332	0.0680683	0.100669	0.0754429	0.0718622	0.0899126	0.0644876	0.0390146	0.0412799	0.0390146	0.0390146	0.0390146	0.056571	0.0390146
PAK	0.0982388	0.037297	0.0427425	0.04619	0.0583267	0.0885341	0.0981292	0.0529799	0.106539	0.0643855	0.037297	0.0419089	0.037297	0.0614598	0.037297	0.0540807	0.037297
PAN	0.0933411	0.0382733	0.0561903	0.0517173	0.0635608	0.0920413	0.0840997	0.065352	0.0903683	0.0725531	0.0382733	0.0456403	0.0382733	0.0382733	0.0382733	0.0554962	0.0382733
PER	0.0941601	0.0372145	0.0509468	0.0468622	0.0601994	0.0894986	0.0893303	0.0589586	0.101625	0.067359	0.0372145	0.0415248	0.0372145	0.0595013	0.0372145	0.0539612	0.0372145
PHL	0.0804561	0.0376845	0.0453562	0.0445038	0.0581156	0.0832748	0.0950471	0.0587217	0.0886166	0.0640051	0.0376845	0.04652	0.0709543	0.0590481	0.0376845	0.0546425	0.0376845
PRY	0.101331	0.0382476	0.0382476	0.0502773	0.0592039	0.0658952	0.101937	0.0668323	0.101814	0.0654476	0.0382476	0.0442025	0.0382476	0.0581139	0.0382476	0.055459	0.0382476
QAT	0.0928402	0.0381443	0.0637978	0.0579958	0.0668529	0.0878002	0.0834026	0.0724741	0.0877675	0.0647499	0.0381443	0.0381443	0.0381443	0.0381443	0.0381443	0.0553092	0.0381443
RUS	0.0896785	0.0373865	0.0373865	0.0478964	0.0737635	0.10048	0.0788181	0.0648766	0.0998599	0.0681712	0.0373865	0.0373865	0.0373865	0.0605395	0.0373865	0.0542107	0.0373865
RWA	0.0997914	0.0372181	0.0410413	0.0516044	0.0556938	0.0840003	0.101833	0.0635545	0.0947981	0.0655687	0.0372181	0.0468312	0.0372181	0.0552266	0.0372181	0.0539662	0.0372181
SAU	0.0691416	0.0374676	0.0638449	0.0609642	0.0662156	0.0866126	0.0703872	0.0783226	0.0595135	0.0590161	0.0374676	0.0391334	0.088679	0.0539704	0.0374676	0.0543283	0.0374676
SDN	0.0944912	0.0371107	0.0414789	0.0464433	0.0558495	0.0852423	0.0904012	0.0697057	0.0791519	0.0679169	0.0371107	0.0549624	0.074993	0.0371107	0.0371107	0.0538104	0.0371107
SEN	0.0944097	0.0373864	0.0439179	0.0437417	0.057205	0.0957426	0.089332	0.0641418	0.104596	0.0636236	0.0373864	0.0465462	0.0373864	0.0556007	0.0373864	0.0542104	0.0373864
SGP	0.0853487	0.04201	0.0750959	0.0779287	0.0770733	0.0694216	0.0963086	0.0798189	0.04201	0.04201	0.04201	0.04201	0.04201	0.04201	0.04201	0.0609144	0.04201
SLE	0.0838357	0.0391261	0.0438133	0.0516958	0.0588422	0.0937858	0.0993547	0.0644919	0.0984542	0.0652626	0.0391261	0.048974	0.0391261	0.0391261	0.0391261	0.056733	0.0391261
SLV	0.0952934	0.0382672	0.05505	0.0482527	0.063089	0.0898642	0.0884569	0.0674575	0.0967708	0.0671581	0.0382672	0.0435172	0.0382672	0.0382672	0.0382672	0.0554873	0.0382672
SWZ	0.0921325	0.0374015	0.0474739	0.0481654	0.0587707	0.0985921	0.084223	0.0677733	0.101255	0.061098	0.0374015	0.0433082	0.0374015	0.0559683	0.0374015	0.0542324	0.0374015
TCD	0.0973294	0.037143	0.0401327	0.0491443	0.0552027	0.0836277	0.0966038	0.0608614	0.0838741	0.064369	0.037143	0.0482962	0.0660966	0.0520331	0.037143	0.0538573	0.037143
TGO	0.0957458	0.0374063	0.0429553	0.0477376	0.0567609	0.0951575	0.0922372	0.0602663	0.103832	0.0621951	0.0374063	0.0435	0.0374063	0.0583421	0.0374063	0.0542392	0.0374063
THA	0.102591	0.0371224	0.0390129	0.0524828	0.0584866	0.0775849	0.108362	0.0564988	0.0960963	0.0679954	0.0371224	0.0410158	0.0371224	0.0604341	0.0371224	0.0538275	0.0371224
TJK	0.101959	0.0381706	0.0435417	0.0472551	0.0577662	0.0624685	0.10358	0.0614053	0.106269	0.065406	0.0381706	0.0448873	0.0381706	0.0592613	0.0381706	0.0553473	0.0381706
TTO	0.0792281	0.0387097	0.0632254	0.0576276	0.0671638	0.0835006	0.0900402	0.0700646	0.0871685	0.0714001	0.0387097	0.0421936	0.0387097	0.0387097	0.0387097	0.0561291	0.0387097
TUN	0.0926477	0.0372741	0.0515968	0.0382974	0.0604956	0.0932599	0.0857758	0.0613959	0.111192	0.0648545	0.0372741	0.0407246	0.0372741	0.0593414	0.0372741	0.0540475	0.0372741
TZA	0.0993971	0.0373088	0.0403347	0.0472855	0.0556689	0.0878215	0.100665	0.0558373	0.103181	0.06531	0.0373088	0.0461614	0.0373088	0.0576964	0.0373088	0.0540978	0.0373088
UGA	0.0970975	0.0370839	0.0403721	0.050334	0.0554185	0.0816289	0.0962783	0.061566	0.0786867	0.0663437	0.0370839	0.0525655	0.0701787	0.0474227	0.0370839	0.0537716	0.0370839
URY	0.0898578	0.0372011	0.055879	0.0500796	0.0632037	0.093296	0.0798139	0.0715483	0.0955376	0.0664974	0.0372011	0.0372011	0.0372011	0.0571383	0.0372011	0.0539418	0.0372011
USA	0.0954718	0.0409156	0.0409156	0.0409156	0.0774389	0.0906519	0.0803195	0.0589226	0.0606536	0.0784346	0.0409156	0.0424593	0.0409156	0.0699111	0.0409156	0.0593278	0.0409156
VNM	0.100734	0.0385751	0.0447478	0.0466424	0.0616503	0.0865452	0.0995566	0.070515	0.0981359	0.0385751	0.0385751	0.0477755	0.0385751	0.0563134	0.0385751	0.0559337	0.0385751
ZAF	0.0958623	0.0370809	0.0370809	0.0485423	0.0572854	0.0827468	0.0935425	0.0713149	0.0751761	0.0654747	0.0370809	0.0508027	0.0782	0.0418808	0.0370809	0.0537671	0.0370809
ZMB	0.101294	0.0383768	0.0419632	0.0515409	0.057341	0.0878951	0.101439	0.0622686	0.0938011	0.0675259	0.0383768	0.0490242	0.0383768	0.0383768	0.0383768	0.0556464	0.0383768
ZWE	0.102001	0.0383502	0.0420134	0.0546885	0.0572612	0.0862082	0.103096	0.0647759	0.0908275	0.0669794	0.0383502	0.0464397	0.0383502	0.0383502	0.0383502	0.0556078	0.0383502
